1  
2  
3  
4  
5  
6  
7  
8  
9  
10  
11  
12  
13  
14  
15  
16  
17  
18  
19  
20  
21  
22

# Validation of physical activity levels from shank-placed Axivity AX6 accelerometers

Fatima Gafoor<sup>1\*</sup>, Matthew Ruder<sup>2</sup>, Dylan Kobsar<sup>1,2</sup>

<sup>1</sup>School of Biomedical Engineering, McMaster University, Hamilton, Ontario, Canada

<sup>2</sup>Department of Kinesiology, McMaster University, Hamilton, Ontario, Canada

\* Corresponding author

E-mail: [gafoorf@mcmaster.ca](mailto:gafoorf@mcmaster.ca) (FG)

## 23 **Abstract**

24           This cross-sectional study aimed to identify and validate cut-points for measuring physical  
25 activity using Axivity AX6 accelerometers positioned at the shank in older adults. Free-living  
26 physical activity was assessed in 35 adults aged 55 and older, where each participant wore a shank  
27 mounted Axivity and a waist mounted ActiGraph simultaneously for 72 hours. Optimized cut-  
28 points for each participant's Axivity data were determined using an optimization algorithm to align  
29 with ActiGraph results. To assess validity between the physical activity assessments from the  
30 optimized Axivity cut-points, a leave-one-out cross validation was conducted. Bland-Altman plots  
31 with 95% limits of agreement, intraclass correlation coefficients (ICC), and mean differences were  
32 used for comparing the systems. The results indicated good agreement between the two  
33 accelerometers when classifying sedentary behaviour (ICC = 0.85) and light physical activity (ICC  
34 = 0.80), and moderate agreement when classifying moderate physical activity (ICC = 0.67) and  
35 vigorous physical activity (ICC = 0.70). Upon removal of a significant outlier, the agreement was  
36 slightly improved for sedentary behaviour (ICC = 0.86) and light physical activity (ICC = 0.82),  
37 but substantially improved for moderate physical activity (ICC = 0.81) and vigorous physical  
38 activity (ICC = 0.96). Overall, the study successfully demonstrated the capability of the resultant  
39 cut-point model to accurately classify physical activity using Axivity AX6 sensors placed at the  
40 shank.

## 41 **Introduction**

42           Physical activity (PA) for the aging population has been identified as a protective factor  
43 for various musculoskeletal disorders and noncommunicable diseases [1]. Even with the well-  
44 known benefits of PA, many older adults are representative of the most inactive portion of the

45 population [2]. Thus, an accurate assessment of PA can help to provide insight on the overall health  
46 and rehabilitation of the aging population. Traditionally, PA data has been collected using self-  
47 reported measures such as questionnaires, activity logs, interviews, and diaries [3]. Common PA  
48 self-report tools include the Physical Activity Scale for the Elderly (PASE), the International  
49 Physical Activity Questionnaire (IPAQ), and the Short Questionnaire to Assess Health-Enhancing  
50 Physical Activity (SQUASH) [4, 5, 6]. However, these measures are subject to recall and social  
51 desirability biases [7]. Furthermore, many have difficulties distinguishing between different PA  
52 intensities in questionnaires [8, 9]. Consequently, these subjective measures lack accuracy, as they  
53 often over- or underestimate the true levels of PA [10].

54 With the advent of wearable accelerometers, researchers can overcome these limitations  
55 and obtain objective measures of PA. These accelerometers can be worn outside of the lab and  
56 collect free-living data for multiple days, thereby providing a more comprehensive understanding  
57 of an individual's PA levels [7]. Among these devices, ActiGraph devices are widely used as the  
58 gold standard for clinical and research-based PA assessment, with over 20,000 papers published  
59 on its use in the past two decades [11].

60 The quantification of PA levels using these devices typically involves assessing time spent  
61 in different PA intensity ranges such as sedentary behaviour (SB), light physical activity (LPA),  
62 moderate physical activity (MPA) and vigorous physical activity (VPA). This is achieved by  
63 measuring the magnitude of three-dimensional acceleration signals, known as the resultant  
64 acceleration. The resultant accelerations are then used to determine activity counts, with higher  
65 accelerations resulting in greater the number of activity counts measured per minute [7].  
66 Subsequently, cut-points are applied to these activity counts to classify the PA intensity,

67 delineating data into the different categories of SB, LPA, MPA, and VPA. These cut-points are  
68 specific to the wear location of the device.

69         The ActiGraph GT9X Link, equipped with an inertial measurement unit (IMU) including  
70 accelerometer, gyroscope, and magnetometer sensors, is one device commonly used for collecting  
71 PA data. These devices can be worn at the wrist, waist, and the ankle but require different cut-  
72 point models for each site as the level of accelerations vary between segments [12]. Therefore,  
73 deploying a sensor at any new location would require updating and validating a new set of cut-  
74 points for that placement site. While wrist, waist, and ankle placements offer sufficient flexibility  
75 for assessing PA, recent advancements in sensor capabilities, including improved data quality,  
76 higher frequency measurements, and enhanced data storage and battery life, have opened up many  
77 new possibilities for free-living PA assessments.

78         Most notably, wearable sensors are being increasingly used to assess free-living gait. Free-  
79 living gait gives us the opportunity to gain insight into the motion of the limbs in an ecologically  
80 valid, real-world setting, rather than a conventional gait lab. While conventional gait labs are  
81 widely used in gait research, they are highly controlled settings and may be non-representative of  
82 an individual's daily, functional gait [13]. Axivity sensors are an example of IMU sensors that  
83 have been used in gait research surrounding physical function and disease state [14], but also  
84 possess PA assessment capability given their potential for high frequency data collections with  
85 enhanced data storage and battery life.

86         While there are a wide variety of placement sites used to acquire free-living gait data, a  
87 common placement to assess movement and impact accelerations near the knee is the proximal  
88 shank [15, 16, 17]. This placement site may offer insights into the progression of musculoskeletal  
89 and neurological diseases, such as knee osteoarthritis and Parkinson's through gait assessments

90 [18, 19]. Although this sensor placement can be ideal in assessing free-living gait, there are no  
91 methods or cut-points available to determine PA from sensors worn at this wear location. As such,  
92 obtaining concurrent PA data while measuring free-living gait would inefficiently require another  
93 sensor placed at one of the previously validated sites.

94 Therefore, the purpose of this study is to develop and validate cut-points for a free-living  
95 gait-capable sensor, the Axivity AX6, placed at the proximal shank by comparing it to the gold  
96 standard waist-mounted ActiGraph GT9X. It was hypothesized that the agreement of SB and LPA  
97 would be higher than the agreement of MPA and VPA. The outcomes compared between the  
98 sensors were the percentage of time spent in the different PA intensities: SB, LPA, MPA, and VPA  
99 for a total wear time of 72 hours.

## 100 **Methods**

### 101 **Participants**

102 Thirty-five adults over the age of 55 years (18F, age:  $71 \pm 9$  years, height:  $167.28 \pm 9.79$   
103 cm, mass:  $76.50 \pm 15.10$  kg, BMI:  $27.00 \pm 3.62$  kg/m<sup>2</sup> ) were recruited in this cross-sectional  
104 validation study. The inclusion criteria included anyone over the age of 55 years that could  
105 ambulate without any walking aids. Participants were recruited from the Physical Activity Centre  
106 of Excellence (PACE) at McMaster University, a centre which encourages community exercise  
107 and rehabilitation for older adults, from January 12, 2023 to March 23, 2023. All participants  
108 provided their written informed consent prior to enrolling in this study. This study was approved  
109 by the McMaster Research Ethics Board, Hamilton, ON.

110

### 111 **Procedures**

112 Participants were asked to report their age, sex, height, mass. Each subject reported if they  
113 had received any lower limb injuries in the past year, had been diagnosed with osteoarthritis, and  
114 if they had received any lower limb replacement surgeries. Two wearable sensors were used to  
115 concurrently collect free-living PA data for 72 consecutive hours. The first of which was the gold  
116 standard ActiGraph GT9X (ActiGraph LLC, FL, United States) which was worn by each  
117 participant above the right iliac crest with a waistband and pouch which held the  
118 device. Participants were encouraged to ensure the pouch sat above their right hip for the full 72  
119 hours. Participants were instructed to only take off the waistband to shower or bath, and if  
120 necessary, while sleeping, and wear it immediately upon waking and after their shower or bath.  
121 The ActiGraph was initialized to start collecting  $\pm 8g$  accelerometer data at 100 Hz simultaneously  
122 with the Axivity for 72 hours through the ActiLife v6.13.4 software. The ‘idle’ sleep mode in the  
123 ActiLife software was disabled for the ActiGraph sensors.

124 The sensor to be validated was the Axivity AX6 (Axivity Ltd, Newcastle upon Tyne,  
125 United Kingdom) which was placed below the right knee, medial and inferior to the right tibial  
126 tuberosity, of each participant using SIMPATCH adhesive patches. The Axivity accelerometer  
127 was initialized through the Open Movement software (OMGui, version 1.0.0.44) and recorded  $\pm 8g$   
128 accelerometer data at 100Hz, as well as  $\pm 1000^\circ/s$  gyroscope data that was not analyzed in the  
129 current study. Participants were shaved with an electric razor (Philips OneBlade, Amsterdam,  
130 Netherlands) before the sensors were placed to ensure the sensors were both comfortable and  
131 adhered to the skin well for the entirety of the 72 hours.

132

## 133 **Data analysis**

134           Following the retrieval of the sensors after 72 hours of wear, the data from the ActiGraphs  
135 were downloaded and processed through the ActiLife software. Each participants' data was  
136 categorized into SB, LPA, MPA, and VPA using the Freedson cut-points and 60-second epochs  
137 [20] which are available through the ActiLife software. The percentage of time spent in the  
138 different intensities was computed by the ActiLife software, based on the activity counts per  
139 minute. The time totalled to 72 hours for each participant.

140           Raw from the Axivity sensor were downloaded through the OpenMovement software  
141 (OMGui) and saved in a binary CWA file. An open-source MATLAB (MathWorks, Natick, MA,  
142 USA) script by Felix Liu [21], which uses methods published by Brønd, Andersen, and Arvidsson  
143 [22] was used to generate ActiGraph equivalent activity counts per minute from Axivity  
144 accelerometers. The activity counts for each participant were categorized into PA intensities using  
145 optimized cut-points for each participant. However, using the same cut-point values applied to the  
146 waist data would results in invalid data given the difference in acceleration signals across these  
147 sites [23]. Therefore, to optimize a new set of cut-points for the shank-placed Axivity sensor, an  
148 optimization algorithm in MATLAB was created, using the Global Optimization Toolbox [24].  
149 Fig 1 outlines the optimization algorithm and resulting cross validation. In short, this optimization  
150 algorithm was given raw Axivity acceleration data, an initial starting set of cut-points based on  
151 pilot testing of data collected prior to this study, and the gold-standard results obtained from the  
152 ActiGraph (i.e., time spent in SB, LPA, MPA, VPA). It then sequentially optimized the cut-points  
153 for the Axivity data by first evaluating SB, then LPA, MPA, and finally VPA, resulting in three  
154 values to distinguish SB, LPA, MPA, and VPA. In other words, the optimization algorithm was  
155 given the raw data from the Axivity at the shank and asked to find the cut-points that best  
156 approximated the results from the waist-mounted ActiGraph. This optimization occurred at the

157 individual level, resulting in 35 distinct sets of cut-points (i.e., one set for each participant). To  
158 generate a cross-validated set of cut-points that were blinded from each individual's result, a leave-  
159 one-out cross validation (LOOCV) was applied. This involved averaging the cut-points from 34  
160 participants (i.e. all other participants) into a single set of cut-points that could then be applied to  
161 the data of the left-out subject. Consequently, the PA data generated for each subject was solely  
162 based on the optimized results from the other 34 subjects, ensuring complete blinding to the  
163 information of the excluded subject.

164

165 **Fig 1. Flowchart of Leave-one-out cross validation analysis.**

## 166 **Statistical analysis**

167 The agreement between the ActiGraph and the LOOCV Axivity results for each PA  
168 intensity: SB, LPA, MPA, and VPA, were assessed using Bland-Altman plots with 95% limits of  
169 agreement (LOA; mean difference of methods  $\pm 1.96$  SD) [25]. Additionally, intraclass correlation  
170 coefficients (ICC; single measure, absolute agreement) with 95% confidence intervals (CIs) were  
171 computed for each intensity to measure reliability of the Axivity. The ICC values were interpreted  
172 as poor ( $ICC < 0.5$ ), moderate ( $0.5 < ICC < 0.75$ ), good ( $0.75 < ICC < 0.9$ ), and excellent ( $ICC >$   
173  $0.9$ ) [26]. The agreement between the ActiGraph and individually optimized Axivity results were  
174 also computed, to serve as a comparison of the training data (i.e., individually optimized) versus  
175 the generalizable, cross-validated results.

176

## 177 **Results**

178 Participant demographics are reported in Table 1. While 35 individuals were recruited for  
179 the study, one participants' data was omitted from the analysis due to early removal of the Axivity



180 sensor. Results from the training model and the LOOCV analysis are shown in Table 2. Individual  
 181 results from the LOOCV analysis are shown in the Bland-Altman plots in Fig 2. The results from  
 182 the optimized cut-points training model matched closely with the ActiGraph results and all  
 183 intensities had excellent agreement, as expected given they are individually optimized. When  
 184 performing the LOOCV analysis, results showed the SB and LPA have good reliability, with mean  
 185 differences of 2.40% and 2.37%, respectively. Whereas the MPA and VPA have moderate  
 186 reliability and mean differences of 0.51% and 0.10% respectively.

187 **Table 1. Participant Demographics.**

|                                     |                              |
|-------------------------------------|------------------------------|
| Age                                 | 71 ± 9 years                 |
| Male                                | 48.6 %                       |
| Height                              | 167.3 ± 9.8 cm               |
| Mass                                | 76.5 ± 15.1 kg               |
| BMI                                 | 27.0 ± 3.6 kg/m <sup>2</sup> |
| Previous Lower Limb Surgeries       | 5.7%                         |
| Previous Lower Limb Replacements    | 11.4%                        |
| Diagnosed Osteoarthritis            | 31.4%                        |
| Mean Oxford Knee Score <sup>a</sup> | 37.3 ± 7.1                   |

188 <sup>a</sup>The Oxford Knee Score measures an individual’s daily level of function, and how they have been  
 189 impacted by pain in their knees. Participants only filled out the OKS questionnaire if they indicated  
 190 they had osteoarthritis in either or both of their knees. Scores range from 0 to 48, with 48  
 191 representing maximal functioning knees [27]. A score ranging from 30 to 39 may indicate mild to  
 192 moderate knee osteoarthritis [28].

194 **Table 2. Results.**

| PA Intensity | Training Model   |                     |                         | LOOCV Analysis    |                     |                         |
|--------------|------------------|---------------------|-------------------------|-------------------|---------------------|-------------------------|
|              | ICC              | Mean Difference (%) | 95% Limits of Agreement | ICC               | Mean Difference (%) | 95% Limits of Agreement |
| Sedentary    | 0.99 (0.99, 1.0) | 0.01 ± 0.01         | -0.02, 0.02             | 0.85 (0.73, 0.92) | 2.40 ± 1.84         | -6.11, 5.85             |
| Light        | 0.99 (0.99, 1.0) | 0.01 ± 0.01         | -0.02, 0.02             | 0.80 (0.65, 0.9)  | 2.37 ± 1.97         | -5.93, 6.25             |

|          |                   |             |             |                   |             |             |
|----------|-------------------|-------------|-------------|-------------------|-------------|-------------|
| Moderate | 0.98 (0.96, 0.99) | 0.05 ± 0.22 | -0.03, 0.03 | 0.67 (0.44, 0.82) | 0.51 ± 0.70 | -1.96, 1.82 |
| Vigorous | 0.96 (0.93, 0.98) | 0.04 ± 0.22 | -0.02, 0.02 | 0.70 (0.48, 0.84) | 0.10 ± 0.73 | -1.96, 1.30 |

195

196 **Fig 2. Bland-Altman plot of the time spent in different PA intensities in minutes, for**  
 197 **agreement between the Axivity and the ActiGraph in the LOOCV analysis.**

198

199 After initial data analysis, a significant outlier was identified in the LOOCV analysis.

200 Outliers were defined as data points that deviated significantly from the remaining values of the

201 dataset, using a criterion of falling outside three standard deviations from the mean value. Based

202 on this criterion, one participant was considered an outlier in the LOOCV dataset. In order to

203 ensure the integrity of the results and subsequent cut-point models, a careful decision was made to

204 exclude this outlier from the analysis. By removing this outlier from the dataset, we aimed to

205 achieve a more representative dataset for further analysis. Following the outlier’s removal, ICCs

206 for SB, LPA, and MPA showed good agreement, while the ICC for VPA showed excellent

207 agreement, as depicted in Table 3. Individual results from the LOOCV analysis with the outlier

208 removed are shown in the Bland-Altman plots in Fig 3.

209 **Table 3. Results with outlier removed.**

| PA Intensity | Training Model    |                     |                         | LOOCV Analysis    |                     |                         |
|--------------|-------------------|---------------------|-------------------------|-------------------|---------------------|-------------------------|
|              | ICC               | Mean Difference (%) | 95% Limits of Agreement | ICC               | Mean Difference (%) | 95% Limits of Agreement |
| Sedentary    | 0.99 (0.99, 1.0)  | 0.01 ± 0.01         | -0.03, 0.02             | 0.86 (0.74, 0.93) | 2.34 ± 1.83         | -5.88, 5.88             |
| Light        | 0.99 (0.99, 1.0)  | 0.01 ± 0.01         | -0.03, 0.03             | 0.82 (0.66, 0.91) | 2.28 ± 1.94         | -5.92, 5.94             |
| Moderate     | 0.98 (0.96, 0.99) | 0.01 ± 0.01         | -0.03, 0.03             | 0.81 (0.64, 0.90) | 0.42 ± 0.46         | -1.20, 1.27             |

|          |                   |              |             |                   |             |             |
|----------|-------------------|--------------|-------------|-------------------|-------------|-------------|
| Vigorous | 0.96 (0.93, 0.98) | 0.004 ± 0.01 | -0.02, 0.02 | 0.96 (0.92, 0.98) | 0.10 ± 0.23 | -0.53, 0.45 |
|----------|-------------------|--------------|-------------|-------------------|-------------|-------------|

210

211  
212 **Fig 3. Bland-Altman plot of the time spent in different PA intensities in minutes, for**  
213 **agreement between the Axivity and the ActiGraph in the LOOCV analysis, with the outlier**  
214 **removed.**

215  
216 Based on these results, the resultant cut-points developed for the Axivity accelerometer,  
217 when placed below the knee, were computed as the average of the 34 participants and are shown  
218 in Table 4. Also shown in Table 4 are the cut-points after the outlier was removed, which is the  
219 more representative set of cut-points to use for accelerometers worn at the shank.

220 **Table 4. Resultant Cut-points.**

|           | Counts per Minute |                 |
|-----------|-------------------|-----------------|
| Intensity | Complete Dataset  | Outlier Removed |
| Sedentary | 0 - 777           | 0 - 792         |
| Light     | 778 - 8415        | 793 - 8356      |
| Moderate  | 8416 - 18731      | 8357 - 18437    |
| Vigorous  | 18732 <           | 18438 <         |

221

## 222 Discussion

223 The purpose of this study was to determine and validate cut-points to measure PA with  
224 Axivity sensors placed at the shank in older adults. Overall, the Axivity demonstrated good  
225 agreement with the gold standard for PA assessment, the ActiGraph, when assessing SB and LPA.  
226 When classifying MPA and VPA, the Axivity showed moderate agreement with the ActiGraph.  
227 However, with outliers accounted for, MPA and VPA showed good and excellent agreement,  
228 respectively. These data demonstrated that accelerometers placed just below the knee can  
229 effectively measure an older adult's PA. Overall, the resultant cut-points determined in this study

230 enable the assessment of PA in older adults at the proximal shank, either independently or in  
231 conjunction with research focused on free-living gait data from this site.

232 Our results supported our original hypothesis which predicted that SB and LPA would have  
233 greater agreement than MPA and VPA with the ActiGraph, as the SB and LPA demonstrated ICCs  
234 of 0.85 and 0.80, respectively. Whereas the MPA and VPA intensities demonstrated ICCs of 0.67  
235 and 0.70, respectively. This may be because participants, being older adults, did not all perform  
236 large amounts of MPA and VPA. The average percentage of time spent in VPA was 1.04 %, with  
237 26 participants having no VPA. This likely reduced the samples of MPA and VPA collected and  
238 could have affected the average of the resultant cut-points to identify MPA and VPA. These results  
239 are consistent with previous studies that assessed PA between ActiGraph and other devices,  
240 including the Axivity, which also found greatest agreement when classifying SB and LPA over  
241 MPA, and VPA, such as the study done by Rowlands et al. [29], due to the relatively small amount  
242 of time spent in moderate and vigorous PA levels [30].

243 With one outlier removed, these ICCs improved to 0.86, 0.82, 0.81, and 0.96 for SB, LPA,  
244 MPA, and VPA, respectively. Upon evaluation, the recorded Axivity accelerations and  
245 subsequently derived activity counts of the outlier were substantially higher in magnitude  
246 compared to those of the remaining participants, despite the ActiGraph data of the outlier aligning  
247 with that of the other participants. Consequently, the outlier's optimized cut-points were  
248 significantly greater than the average cut-points of all subjects. Thus, when conducting the  
249 LOOCV including the outlier's optimized cut-points, the model overestimated the time spent in  
250 Specifically, the resultant cut-points including the outlier are higher for MPA and VPA intensities  
251 when compared to the cut-points with the outlier removed. Higher recorded or erroneous  
252 accelerations from one subject's Axivity can be due to many potential reasons, which can include

253 sensor movement as a result of being loosely attached and the introduction of artifacts and noise  
254 into the accelerometer readings. Nevertheless, we cannot pin-point the exact cause as to why one  
255 subject's Axivity sensor collected greater accelerations than others' Axivity sensors. The  
256 optimized cut-points of the outlier affected all PA intensities, however, it had a limited impact on  
257 SB and LPA data, which further highlights the quality of these outcomes in older adults compared  
258 to MPA and VPA. Despite the outlier's removal improving the results to excellent validity, we  
259 still caution the use of VPA data in older adults moving forward, given the limited amount of data  
260 in these intensity levels.

261         With respect to the cut-points used for MPA and VPA, they are similar to cut-points found  
262 in a study done by Rhudy et. al. [31] which identified cut-points for the ActiGraph GT9X at  
263 varying wear-locations proximal to the shank, such as the ankle, foot, along with the wrist and hip  
264 to measure moderate and vigorous PA. These cut-points are shown in Table 5 along with the cut-  
265 points from the shank developed from the results of the current study. These wear locations offer  
266 some opportunity for comparing cut-points at proximal locations, such as the ankle and foot.  
267 Theoretically, the cut-points for the ankle and foot should be greater, as the impact accelerations  
268 experienced would be greater than those at the shank. It is also expected that the cut-points for the  
269 shank for both MPA and VPA are greater than those of the hip. This is mostly reflected in the  
270 results from Rhudy et al. and the current study, as the cut-points for MPA and VPA measured at  
271 the ankle are 14767 and 17818 counts per minute, respectively, and the cut-points for MPA and  
272 VPA measured at the foot are 20575 and 22629 counts per minute, respectively. For the current  
273 study, the cut-points for MPA and VPA measured at the shank are 8357 and 18438. As expected,  
274 these shank cut-points are greater than the cut-points for the hip for MPA and VPA, which are  
275 4978 and 6227 counts per minute. Furthermore, the cut-point for MPA at the shank is less than the

276 cut-points at the ankle and foot, as predicted. While the cut-point for VPA at the shank is less than  
277 the cut-point for the foot, it is greater than the cut-point at the ankle. This could be since the cut-  
278 points for the foot and ankle in the aforementioned study were identified through a young, healthy  
279 population in a controlled setting, whereas the current study's population consisted solely of older  
280 adults in free-living conditions.

281  
282 **Table 5. Cut-points for MPA and VPA at foot, ankle, and hip wear locations from Rhudy et**  
283 **al. [31].**

| Wear Location | MPA cut-point | VPA cut-point |
|---------------|---------------|---------------|
| Foot          | 20575         | 22629         |
| Ankle         | 14767         | 17818         |
| Shank         | 8357          | 18438         |
| Hip           | 4978          | 6227          |

284  
285 This study has some limitations to be discussed. Firstly, participants removing the  
286 ActiGraph sensor when showering may have influenced the results, as the Axivity was worn for  
287 the full 72 hours. This likely would have minimal influence over the results with both  
288 accelerometers likely resulting in a SB classification, as showers are typically short in duration  
289 and most people won't move a significant amount while showering. However, if participants forgot  
290 to wear, or delayed, the placement of the ActiGraph after their shower, this could adversely affect  
291 agreement between two sensors.

292 Secondly, it is possible that individuals could have performed movement with their lower  
293 limbs, without moving their trunk, such as leg raises, which could have recorded more  
294 accelerations in the Axivity than the ActiGraph, if the hip-worn accelerometer was not  
295 experiencing movement. This would have impacted the final cut-points that were developed.  
296 Nevertheless, the current findings present a first step at classifying PA from shank-placed

297 accelerometers and identifying cut-points for this wear location, which can be widely used in gait  
298 research in the elderly.

299

## 300 **Conclusion**

301 These results displayed a good agreement between the gold standard ActiGraph sensors  
302 and the Axivity sensors to classify PA and SB when worn at the shank. The resultant cut-points  
303 can be used for accelerometers, including the Axivity and ActiGraph, worn specifically just below  
304 the knee at the shank. The introduction of shank cut-points are a novel contribution that will aid in  
305 simplifying concurrent PA assessments that occur in older adults also completing gait assessments.

306

## 307 **Acknowledgements**

308 I would like to thank the Physical Activity Centre of Excellence at McMaster University for  
309 supporting this study, as well as all the participants for their time and efforts, that made this study  
310 possible.

311

## 312 **References**

- 313 1. Langhammer B, Bergland A, Rydwik E. The importance of physical activity exercise among  
314 older people. *BioMed Res Int.* 2018;2018: 7856823. doi:10.1155/2018/7856823
- 315 2. Watson KB, Carlson SA, Gunn JP, Galuska DA, O'Connor A, Greenlund KJ, et al. Physical  
316 inactivity among adults aged 50 years and older - United States, 2014. *MMWR Morb*  
317 *Mortal Wkly Rep.* 2016;65: 954–958. doi:10.15585/mmwr.mm6536a3
- 318 3. Martins JC, Aguiar LT, Nadeau S, Scianni AA, Teixeira-Salmela LF, Faria CDC de M.  
319 Measurement properties of self-report physical activity assessment tools in stroke: a  
320 protocol for a systematic review. *BMJ Open.* 2017;7: e012655. doi:10.1136/bmjopen-2016-  
321 012655

- 322 4. Washburn RA, McAuley E, Katula J, Mihalko SL, Boileau RA. The physical activity scale  
323 for the elderly (PASE): evidence for validity. *J Clin Epidemiol*. 1999;52: 643–651.  
324 doi:10.1016/s0895-4356(99)00049-9
- 325 5. Craig CL, Marshall AL, Sjöström M, Bauman AE, Booth ML, Ainsworth BE, et al.  
326 International physical activity questionnaire: 12-country reliability and validity. *Med Sci*  
327 *Sports Exerc*. 2003;35: 1381–1395. doi:10.1249/01.MSS.0000078924.61453.FB
- 328 6. Wendel-Vos GCW, Schuit AJ, Saris WHM, Kromhout D. Reproducibility and relative  
329 validity of the short questionnaire to assess health-enhancing physical activity. *J Clin*  
330 *Epidemiol*. 2003;56: 1163–1169. doi:10.1016/s0895-4356(03)00220-8
- 331 7. Sylvia LG, Bernstein EE, Hubbard JL, Keating L, Anderson EJ. A practical guide to  
332 measuring physical activity. *J Acad Nutr Diet*. 2014;114: 199–208.  
333 doi:10.1016/j.jand.2013.09.018
- 334 8. Sallis JF, Saelens BE. Assessment of physical activity by self-report: status, limitations, and  
335 future directions. *Res Q Exerc Sport*. 2000;71: 1–14.  
336 doi:10.1080/02701367.2000.11082780
- 337 9. Timperio A, Salmon J, Crawford D. Validity and reliability of a physical activity recall  
338 instrument among overweight and non-overweight men and women. *J Sci Med Sport*.  
339 2003;6: 477–491. doi:10.1016/S1440-2440(03)80273-6
- 340 10. Prince SA, Adamo KB, Hamel ME, Hardt J, Gorber SC, Tremblay M. A comparison of  
341 direct versus self-report measures for assessing physical activity in adults: a systematic  
342 review. *Int J Behav Nutr Phys Act*. 2008;5: 56. doi:10.1186/1479-5868-5-56
- 343 11. Neishabouri A, Nguyen J, Samuelsson J, Guthrie T, Biggs M, Wyatt J, et al. Quantification  
344 of acceleration as activity counts in ActiGraph wearable. *Sci Rep*. 2022;12: 11958.  
345 doi:10.1038/s41598-022-16003-x
- 346 12. Romero E, Neuman M, Warrington R. Kinetic energy harvester for body motion. 2009.
- 347 13. Shah VV, McNames J, Mancini M, Carlson-Kuhta P, Spain RI, Nutt JG, et al. Laboratory  
348 versus daily life gait characteristics in patients with multiple sclerosis, Parkinson’s disease,  
349 and matched controls. *J NeuroEngineering Rehabil*. 2020;17: 159. doi:10.1186/s12984-020-  
350 00781-4
- 351 14. Powell D, Nouredanesh M, Stuart S, Godfrey A. Investigating the AX6 inertial-based  
352 wearable for instrumented physical capability assessment of young adults in a low-resource  
353 setting. *Smart Health*. 2021;22: 100220. doi:10.1016/j.smhl.2021.100220
- 354 15. Li Y, Wang L. Human activity recognition based on residual network and BiLSTM.  
355 sensors. 2022;22: 635. doi:10.3390/s22020635  
356



- 357 16. Li Q, Young M, Naing V, Donelan JM. Walking speed estimation using a shank-mounted  
358 inertial measurement unit. *J Biomech.* 2010;43: 1640–1643.  
359 doi:10.1016/j.jbiomech.2010.01.031
- 360 17. Celik Y, Stuart S, Woo WL, Godfrey A. Wearable inertial gait algorithms: impact of wear  
361 location and environment in healthy and Parkinson’s populations. *Sensors.* 2021;21: 6476.  
362 doi:10.3390/s21196476
- 363 18. Tsukamoto H, Saito K, Saito H, Kijima H, Akagawa M, Komatsu A, et al. A novel  
364 classification of coronal plane knee joint instability using nine-axis inertial measurement  
365 units in patients with medial knee osteoarthritis. *Sensors.* 2023;23: 2797.  
366 doi:10.3390/s23052797
- 367 19. Morris R, Hickey A, Del Din S, Godfrey A, Lord S, Rochester L. A model of free-living  
368 gait: A factor analysis in Parkinson’s disease. *Gait Posture.* 2017;52: 68–71.  
369 doi:10.1016/j.gaitpost.2016.11.024
- 370 20. Freedson PS, Melanson E, Sirard J. Calibration of the Computer Science and Applications,  
371 Inc. accelerometer. *Med Sci Sports Exerc.* 1998;30: 777.
- 372 21. Liu F. Axivity\_AX3. 2022. Available: [https://github.com/FelixLiu-SF/Axivity\\_AX3](https://github.com/FelixLiu-SF/Axivity_AX3)
- 373 22. Brønd JC, Andersen LB, Arvidsson D. Generating ActiGraph counts from raw acceleration  
374 recorded by an alternative monitor. *Med Sci Sports Exerc.* 2017;49: 2351–2360.  
375 doi:10.1249/MSS.0000000000001344
- 376 23. LaMunion SR, Bassett DRJ, Toth LP, Crouter SE. Effect of wear location on ActiGraph  
377 activity counts: 2286 Board #299 June 1 2: 00 PM - 3: 30 PM. *Med Sci Sports Exerc.*  
378 2017;49: 643. doi:10.1249/01.mss.0000518693.36595.09
- 379 24. Optimization Toolbox version: 9.4 (R2022b), Natick, Massachusetts: The MathWorks Inc.;  
380 2022.
- 381 25. Martin Bland J, Altman Douglas G. Statistical methods for assessing agreement between two  
382 methods of clinical measurement. *The Lancet.* 1986;327: 307–310. doi:10.1016/S0140-  
383 6736(86)90837-8
- 384 26. Koo TK, Li MY. A guideline of selecting and reporting intraclass correlation coefficients for  
385 reliability research. *J Chiropr Med.* 2016;15: 155–163. doi:10.1016/j.jcm.2016.02.012
- 386 27. Murray DW, Fitzpatrick R, Rogers K, Pandit H, Beard DJ, Carr AJ, et al. The use of the  
387 Oxford hip and knee scores. *J Bone Joint Surg Br.* 2007;89-B: 1010–1014.  
388 doi:10.1302/0301-620X.89B8.19424
- 389 28. Oxford Knee Score | Auckland Surgery. [cited 13 Jul 2023]. Available:  
390 <https://www.aucklandsurgery.co.uk/navigator/oxford-knee-score/>

- 391 29. Rowlands AV, Mirkes EM, Yates T, Cledes S, Davies M, Khunti K, et al. Accelerometer-  
392 assessed physical activity in epidemiology: are monitors equivalent? *Med Sci Sports Exerc.*  
393 2018;50: 257. doi:10.1249/MSS.0000000000001435
- 394 30. Pfister T, Matthews CE, Wang Q, Kopciuk KA, Courneya K, Friedenreich C. Comparison of  
395 two accelerometers for measuring physical activity and sedentary behaviour. *BMJ Open*  
396 *Sport Exerc Med.* 2017;3: e000227. doi:10.1136/bmjsem-2017-000227
- 397 31. Rhudy MB, Dreisbach SB, Moran MD, Ruggiero MJ, Veerabhadrapa P. Cut points of the  
398 Actigraph GT9X for moderate and vigorous intensity physical activity at four different  
399 wear locations. *J Sports Sci.* 2020;38: 503–510. doi:10.1080/02640414.2019.1707956

400

## 401 **Supporting Information**

402 **S1 Table. Participant Activity and ActiGraph Data.** Activity Data is missing from Participant  
403 21 due to early removal of the Activity AX6 sensor.

404

405

## Individual Optimization Process

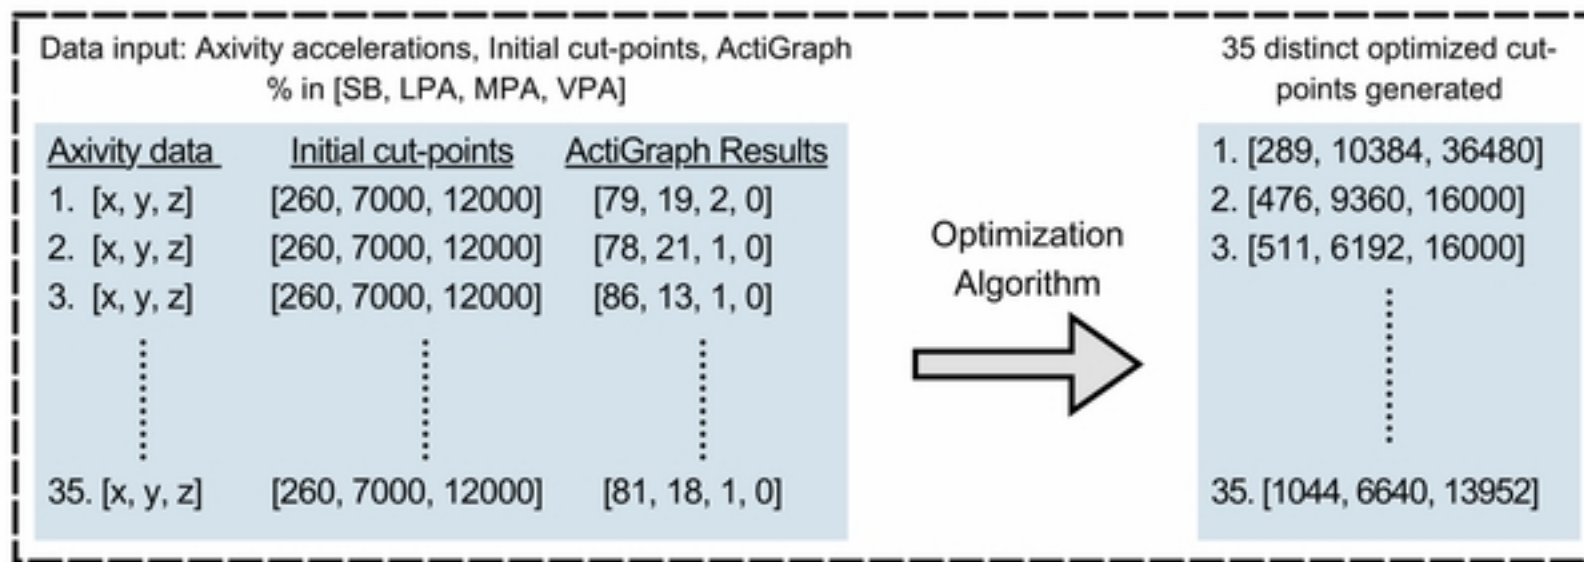

## LOOCV (shown for participant 1)

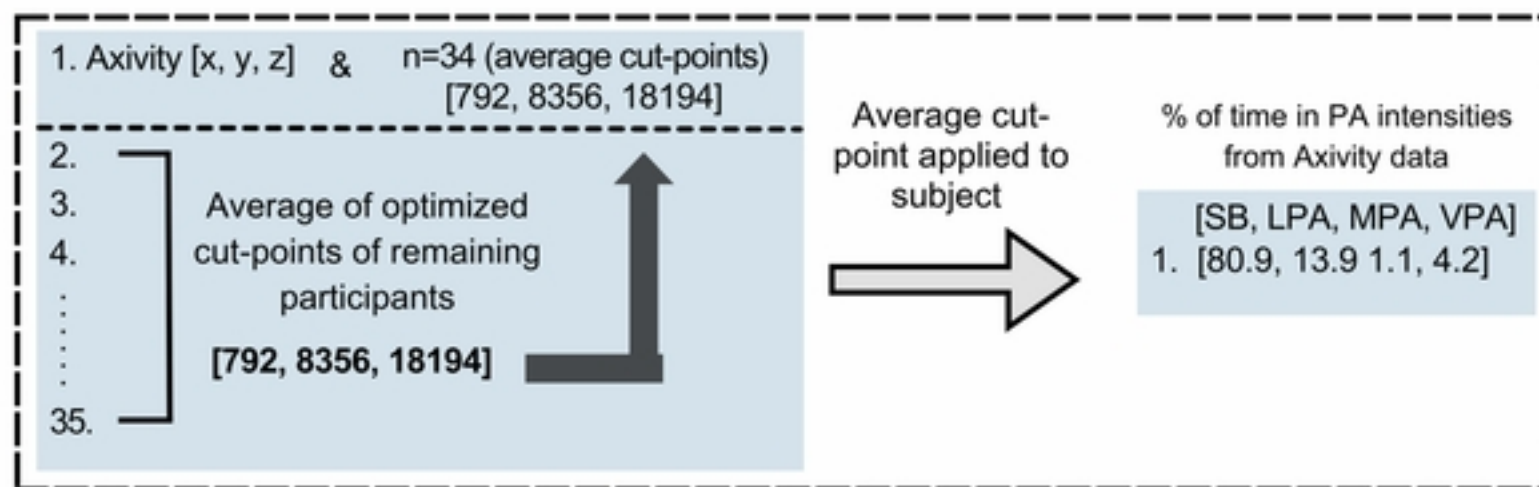

Repeated for all 35 participants

## Results

Percentage of time spent in PA intensities from Axivity LOOCV

|     | [SB, LPA, MPA, VPA]    |
|-----|------------------------|
| 1.  | [80.9, 13.9, 1.1, 4.2] |
| 2.  | [85.1, 13.7, 1.2, 0]   |
| 3.  | [71.2, 27.8, 1.0, 0]   |
| ⋮   |                        |
| ⋮   |                        |
| ⋮   |                        |
| 35. | [77.9, 21.6, 0.4, 0]   |

Fig1

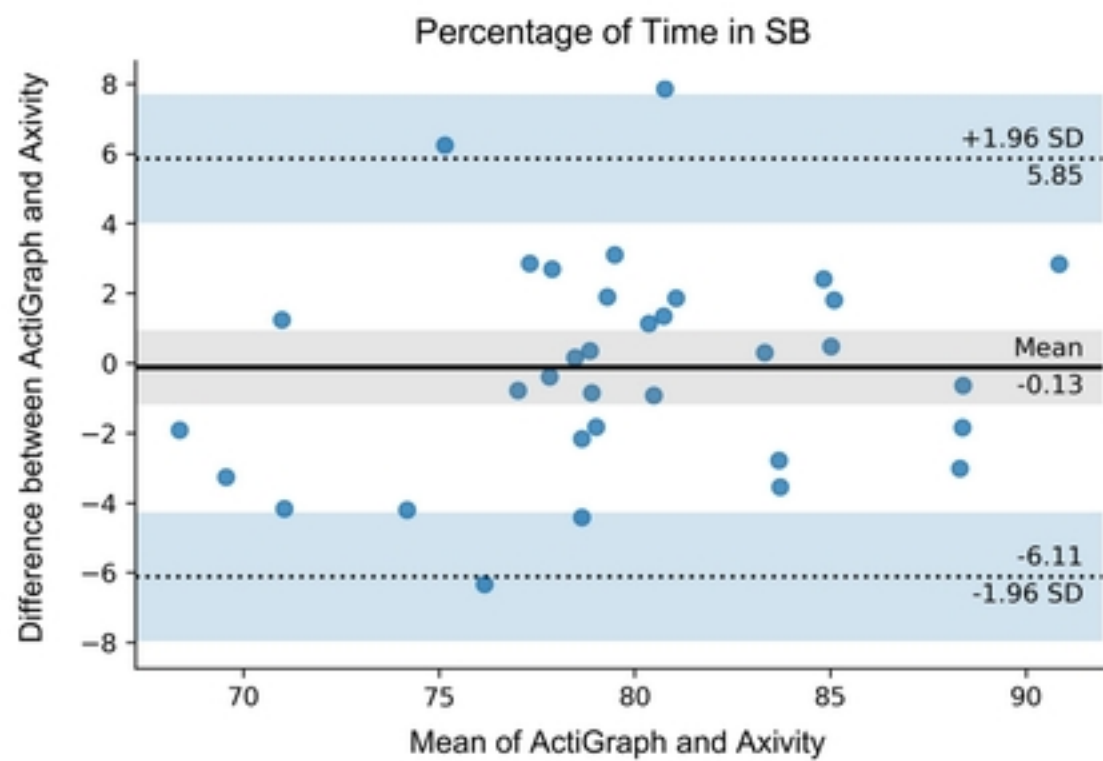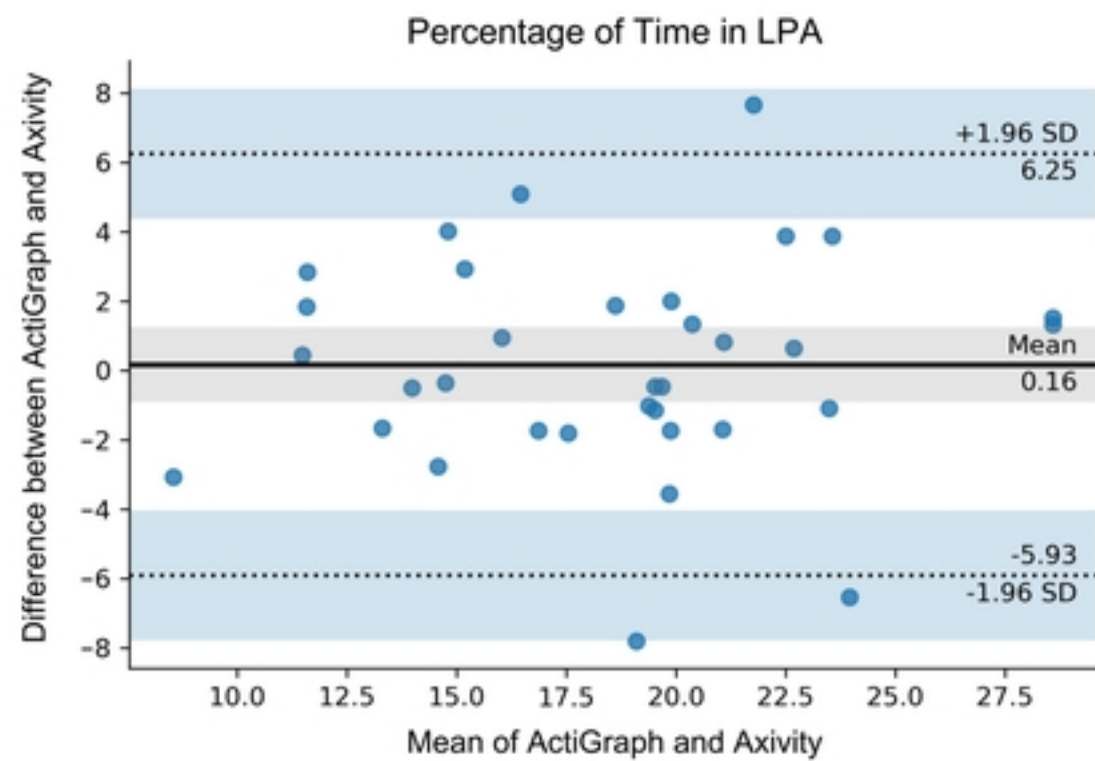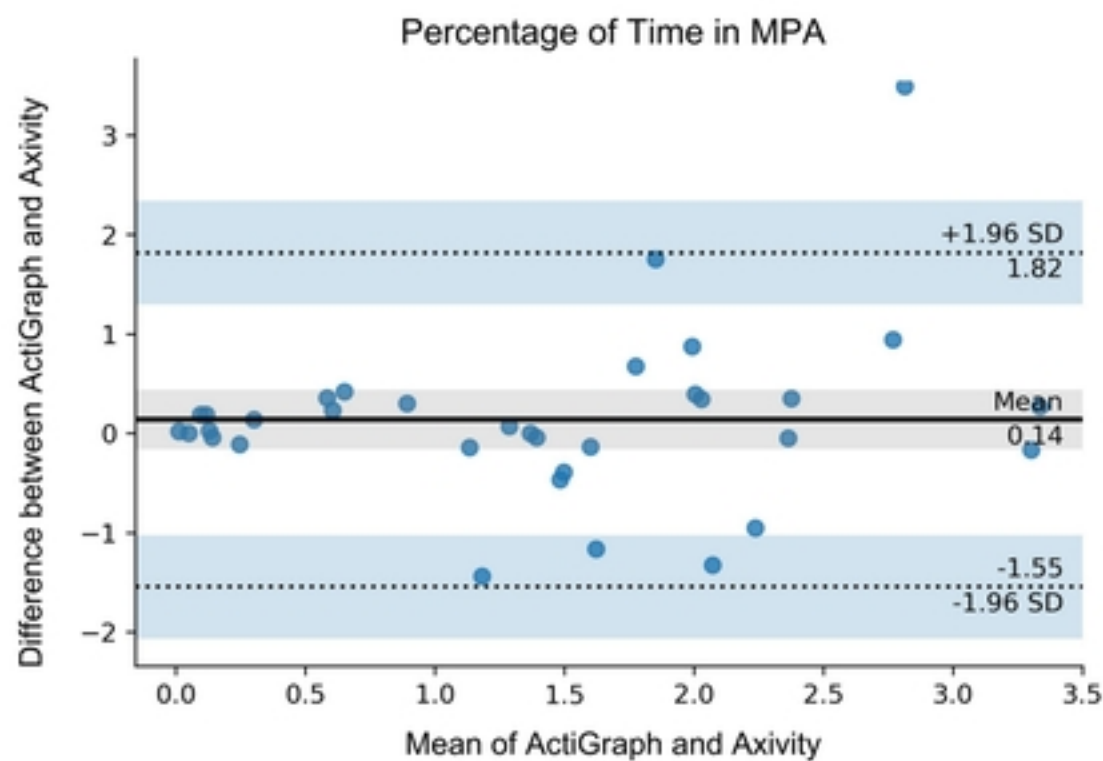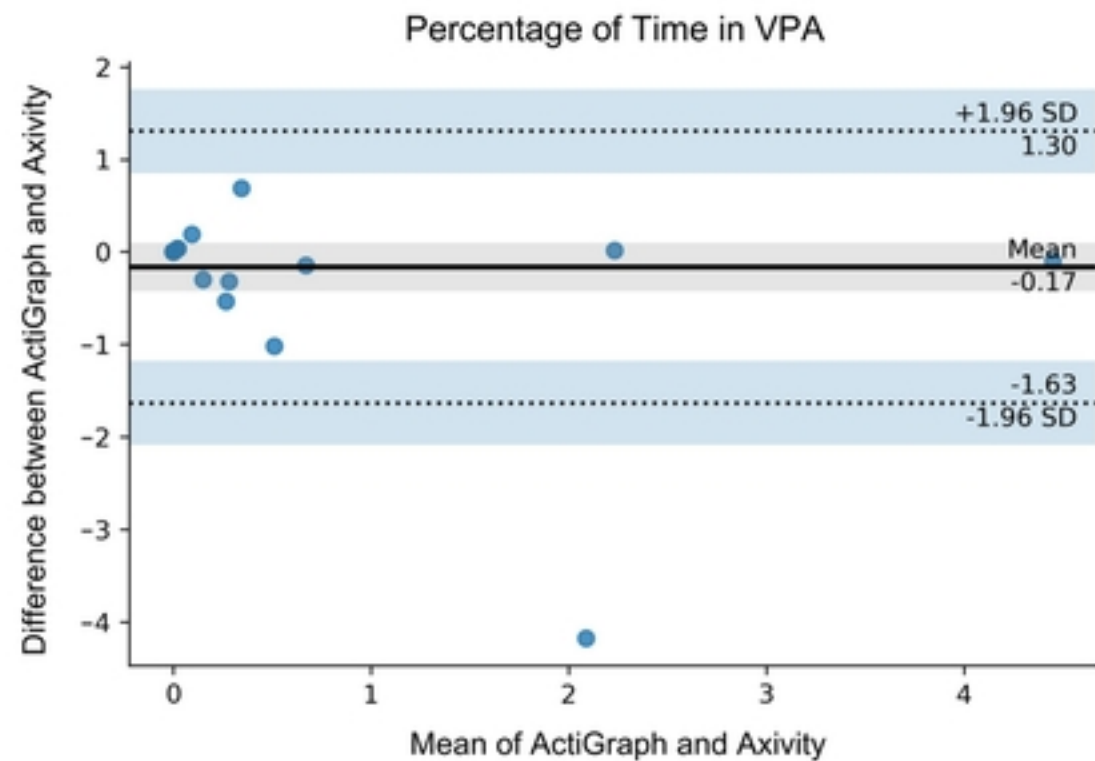

Fig2

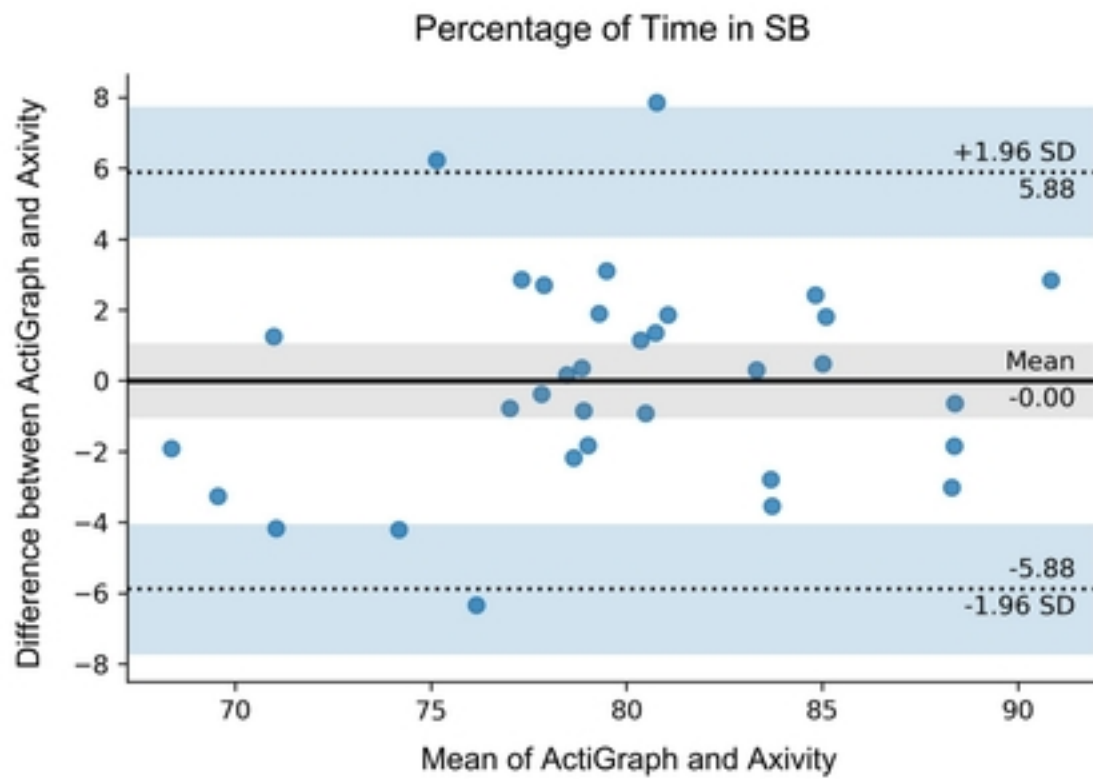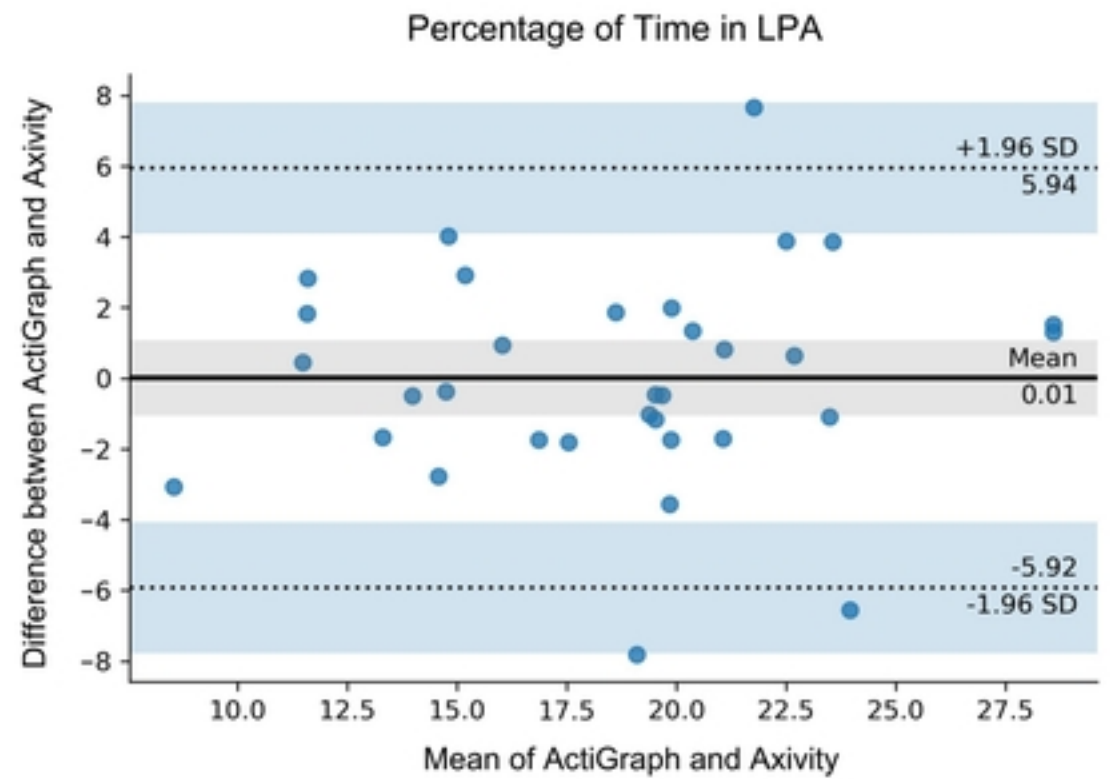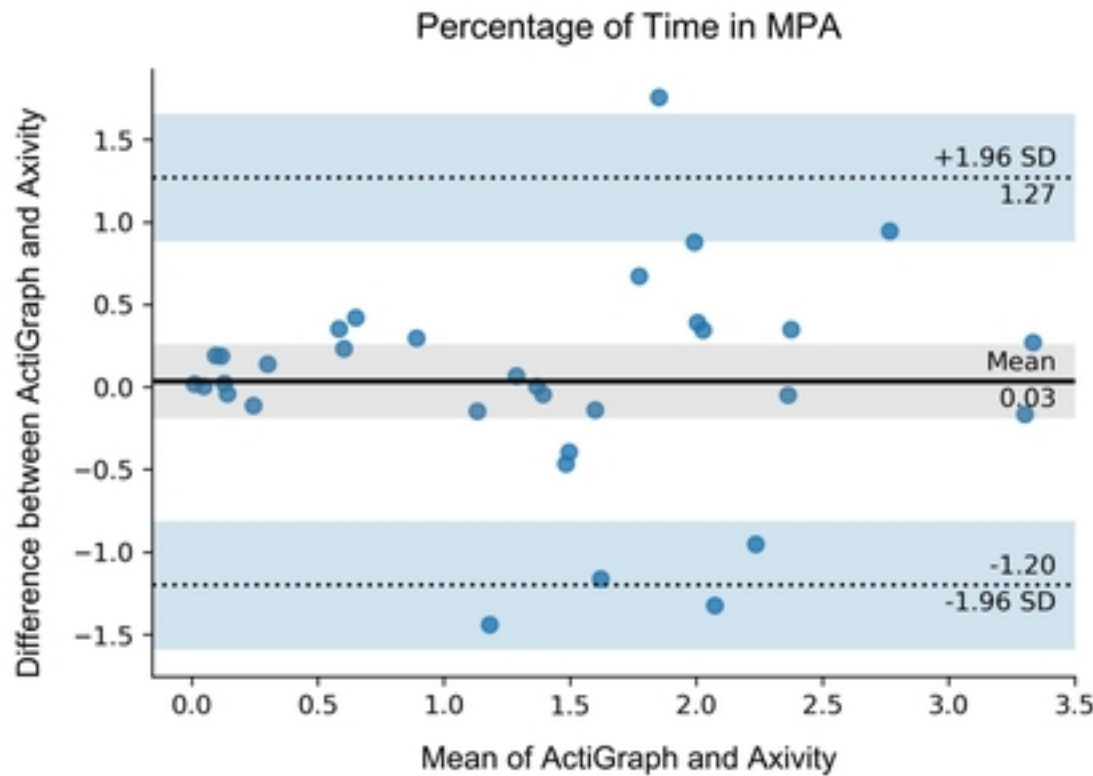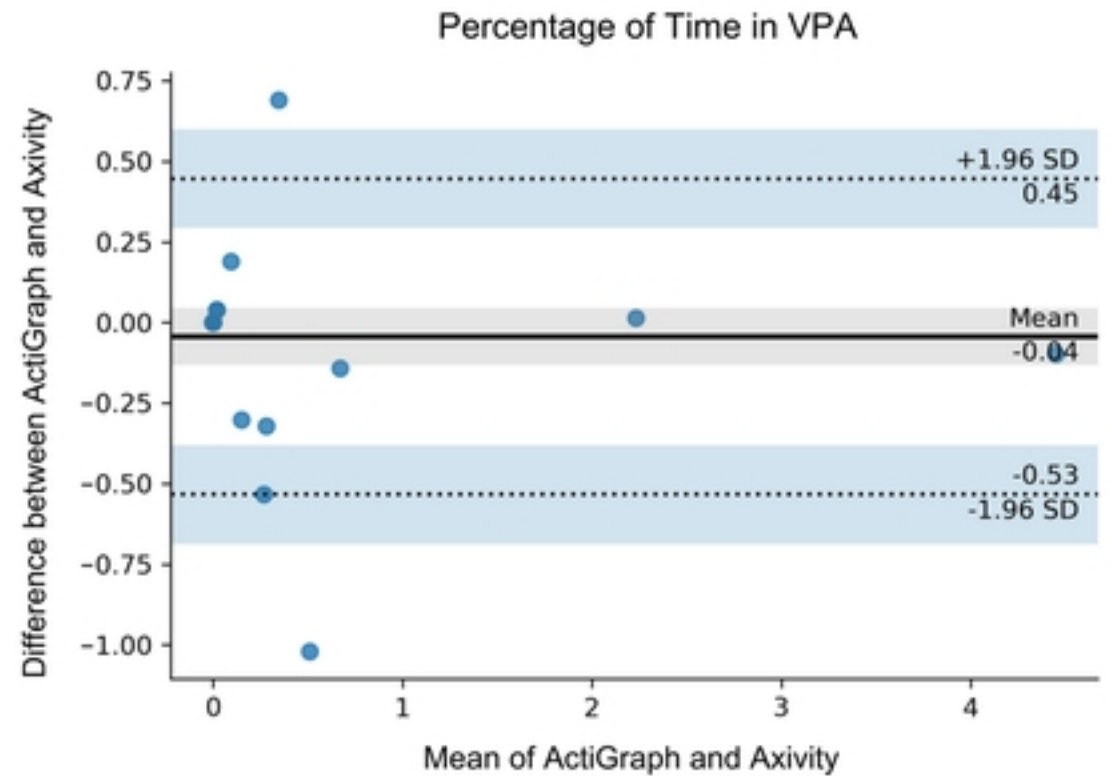

Fig3
